# Supplementary material for: Application of 1H NMR-based metabolomics for discrimination of different parts and development of a new processing workflow for Cistanche deserticola
Source: PubMed Central journal article supplement — Acta Pharm Sin B. 2017 Aug 26;7(6):647–56. doi: 10.1016/j.apsb.2017.07.003 (PMC5687315; doi:10.1016/j.apsb.2017.07.003), 2017-08-26
Supplement: mmc1.pdf [file mmc1.pdf]

**Table S1** Sample information of CD1–CD13.

| No.     | Habitat                               | Part <sup>#</sup> | Processing <sup>*</sup> |
|---------|---------------------------------------|-------------------|-------------------------|
| 1-GU-a  | Alashan, Inner Mongolia               | AP                | a                       |
| 1-GU-b  | Alashan, Inner Mongolia               | AP                | b                       |
| 1-GU-c  | Alashan, Inner Mongolia               | AP                | c                       |
| 1-GD-a  | Alashan, Inner Mongolia               | GP                | a                       |
| 2-GU-a  | Alashan, Inner Mongolia               | AP                | a                       |
| 2-GD-a  | Alashan, Inner Mongolia               | GP                | a                       |
| 3-GU-a  | Alashan, Inner Mongolia               | AP                | a                       |
| 3-GD-a  | Alashan, Inner Mongolia               | GP                | a                       |
| 4-GU-a  | Yongning, Ningxia                     | AP                | a                       |
| 4-GU-b  | Yongning, Ningxia                     | AP                | b                       |
| 4-GU-c  | Yongning, Ningxia                     | AP                | b                       |
| 4-GD-a  | Yongning, Ningxia                     | GP                | a                       |
| 4-GD-b  | Yongning, Ningxia                     | GP                | b                       |
| 4-GD-c  | Yongning, Ningxia                     | GP                | c                       |
| 5-GU-a  | Yongning, Ningxia                     | AP                | a                       |
| 5-GD-a  | Yongning, Ningxia                     | GP                | a                       |
| 6-GU-a  | Yongning, Ningxia                     | AP                | a                       |
| 6-GD-a  | Yongning, Ningxia                     | GP                | a                       |
| 7-GU-a  | Yongning, Ningxia                     | AP                | a                       |
| 7-GD-a  | Yongning, Ningxia                     | GP                | a                       |
| 8-GU-a  | Yongning, Ningxia                     | AP                | a                       |
| 8-GD-a  | Yongning, Ningxia                     | GP                | a                       |
| 9-GU-a  | Tamusu, Alashan, Inner Mongolia       | AP                | a                       |
| 9-GD-a  | amusu, Alashan, Inner Mongolia        | GP                | a                       |
| 10-GD-a | Suhaitugacha, Alashan, Inner Mongolia | GP                | a                       |
| 10-GD-b | Suhaitugacha, Alashan, Inner Mongolia | GP                | b                       |
| 10-GD-c | Suhaitugacha, Alashan, Inner Mongolia | GP                | c                       |
| 11-GU-a | Suhaitugacha, Alashan, Neimenggu      | AP                | a                       |
| 11-GD-a | Suhaitugacha, Alashan, Neimenggu      | GP                | a                       |
| 12-G-a  | Tazhong, Xinjiang                     | WP                | a                       |
| 12-G-b  | Tazhong, Xinjiang                     | WP                | b                       |
| 12-G-c  | Tazhong, Xinjiang                     | WP                | c                       |

<sup>#</sup>: AP, the upper parts; GP, the lower parts; WP, the whole plant;

<sup>\*</sup>: a, successively steamed for 10 min and oven-dried at 60 °C for 48 h; b, direct freeze-drying; c, freeze-drying hyphenated with sequential 10 min-steaming.

**Table S2** Signal assignment of the  $^1\text{H}$  NMR spectrum of CD

| No. | Compound                                                         | Proton signal assignment                                                                                                                                                                                                                                                                                                                                                                               |
|-----|------------------------------------------------------------------|--------------------------------------------------------------------------------------------------------------------------------------------------------------------------------------------------------------------------------------------------------------------------------------------------------------------------------------------------------------------------------------------------------|
| 1   | Nicotinamide                                                     | 9.15 (br s), 8.88, 8.09                                                                                                                                                                                                                                                                                                                                                                                |
| 2   | Formic acid                                                      | 8.48 (s)                                                                                                                                                                                                                                                                                                                                                                                               |
| 3   | Adenosine                                                        | 8.14, 8.12                                                                                                                                                                                                                                                                                                                                                                                             |
| 4   | Adenine                                                          | 8.13, 8.10                                                                                                                                                                                                                                                                                                                                                                                             |
| 5   | Cistanoside B/D                                                  | 7.73 (d, $J=16.0$ Hz)                                                                                                                                                                                                                                                                                                                                                                                  |
| 6   | Echinacoside*                                                    | 7.60 (1H, d, $J=16.0$ Hz, H-7'), 6.28 (1H, d, $J=16.0$ Hz, H-8'), 7.06 (1H, br s, Hz, H-2'), 6.96 (1H, br d, $J=8.0$ Hz, H-6'), 6.78 (1H, d, $J=8.0$ Hz, H-5'), 6.71 (1H, br s, H-2), 6.68 (1H, d, $J=8.0$ Hz, H-5), 6.58 (1H, br d, $J=8.0$ Hz, H-6), 2.80 (2H, m, H-7), 4.39 (1H, d, $J=8.0$ Hz, H-1'''), 4.30 (1H, d, $J=7.5$ Hz, H-1''), 5.18 (1H, br s, H-1'''), 1.09 (3H, d, $J=6.0$ Hz, H-6''') |
| 7   | Acteoside*                                                       | 7.59 (1H, d, $J=16.0$ Hz, H-7'), 6.28 (1H, d, $J=16.0$ Hz, H-8'), 7.01 (1H, d, $J=1.5$ Hz, H-2'), 6.96 (1H, dd, $J=1.5, 8.0$ Hz, H-6'), 6.78 (1H, d, $J=8.0$ Hz, H-5'), 6.70 (1H, d, $J=1.5$ Hz, H-2), 6.68 (1H, d, $J=8.0$ Hz, H-5), 6.57 (1H, dd, $J=1.5, 8.0$ Hz, H-6), 2.80-2.83 (2H, m, H-7), 4.38 (1H, d, $J=7.5$ Hz, H-1''), 5.19 (1H, br s, H-1'''), 1.09 (3H, d, $J=5.5$ Hz, H-6''')          |
| 8   | Isoacteoside                                                     | 7.58 (d, $J=16.0$ Hz)                                                                                                                                                                                                                                                                                                                                                                                  |
| 9   | Indole 3-acetic acid                                             | 7.40 (d, $J=7.0$ Hz)                                                                                                                                                                                                                                                                                                                                                                                   |
| 10  | Phenylalanine                                                    | 7.33                                                                                                                                                                                                                                                                                                                                                                                                   |
| 11  | Tyrosine                                                         | 7.12                                                                                                                                                                                                                                                                                                                                                                                                   |
| 12  | Syringaresinolor its glucoside                                   | 7.02                                                                                                                                                                                                                                                                                                                                                                                                   |
| 13  | <i>cis</i> -type PhGs                                            | 6.95 (d, $J=12.0$ Hz)                                                                                                                                                                                                                                                                                                                                                                                  |
| 14  | Citrusin A/Alaschanioside A/Dehydeodiconiferyl Alcohol glucoside | 6.56 – 6.64                                                                                                                                                                                                                                                                                                                                                                                            |
| 15  | Fumaric acid                                                     | 6.54                                                                                                                                                                                                                                                                                                                                                                                                   |
| 16  | Iridoids                                                         | 6.18 – 6.33                                                                                                                                                                                                                                                                                                                                                                                            |
| 17  | Maleic acid                                                      | 6.02                                                                                                                                                                                                                                                                                                                                                                                                   |
| 18  | Sucrose*                                                         | 5.41 (d, $J=3.6$ Hz), 4.18 (d, $J=7.8$ Hz), 4.04 (t, $J=7.8$ Hz)                                                                                                                                                                                                                                                                                                                                       |

---

|    |                                      |                                                                                               |
|----|--------------------------------------|-----------------------------------------------------------------------------------------------|
| 19 | $\beta$ -Galactose*                  | 5.24 (d, $J = 5.0$ Hz)                                                                        |
| 20 | $\alpha$ -Glucose*                   | 5.20 (d, $J = 3.7$ Hz)                                                                        |
| 21 | $\beta$ -Glucose                     | 4.60 (d, $J = 7.8$ Hz)                                                                        |
| 22 | Malic acid                           | 4.27 (dd, $J = 2.8, 10.0$ Hz ), 2.67 (dd, $J = 3.0, 15.5$ Hz), 2.37 (dd, $J = 10.0, 15.5$ Hz) |
| 23 | Proline                              | 4.09 (m)                                                                                      |
| 24 | Mannitol*                            | 4.00 (d, $J = 10.3$ Hz)                                                                       |
| 25 | Methoxyl group of phenyl derivatives | 3.80 – 3.81                                                                                   |
| 26 | Isocitric acid                       | 3.04                                                                                          |
| 27 | Asparagine acid                      | 2.96                                                                                          |
| 28 | Citric acid                          | 2.73                                                                                          |
| 29 | Ketoglutaric acid                    | 2.52                                                                                          |
| 30 | Pyruvic acid                         | 2.49                                                                                          |
| 31 | Succinic acid                        | 2.42 (s)                                                                                      |
| 32 | Glutamine                            | 2.30                                                                                          |
| 33 | Acetyl of phenyl derivatives         | 1.97 (s)                                                                                      |
| 34 | Lysine                               | 1.71                                                                                          |
| 35 | Alanine                              | 1.49 (d, $J = 7.0$ Hz)                                                                        |
| 36 | Fatty acid                           | 1.32 – 1.35 (m)                                                                               |
| 37 | Threonine                            | 1.27 (m)                                                                                      |
| 38 | 1- <i>O</i> -ethyl-glucoside         | 1.16 (m)                                                                                      |
| 39 | Rha of sugars or PhGs                | 1.06 (d, $J = 6.0$ Hz)                                                                        |
| 40 | 8-Epiloganic acid                    | 1.03 (d, $J = 7.0$ Hz)                                                                        |
| 41 | Isoleucine/Valine                    | 0.98                                                                                          |
| 42 | Leucine                              | 0.93                                                                                          |

---

Note: the components marked with \* were identified with the assistance of reference compounds.

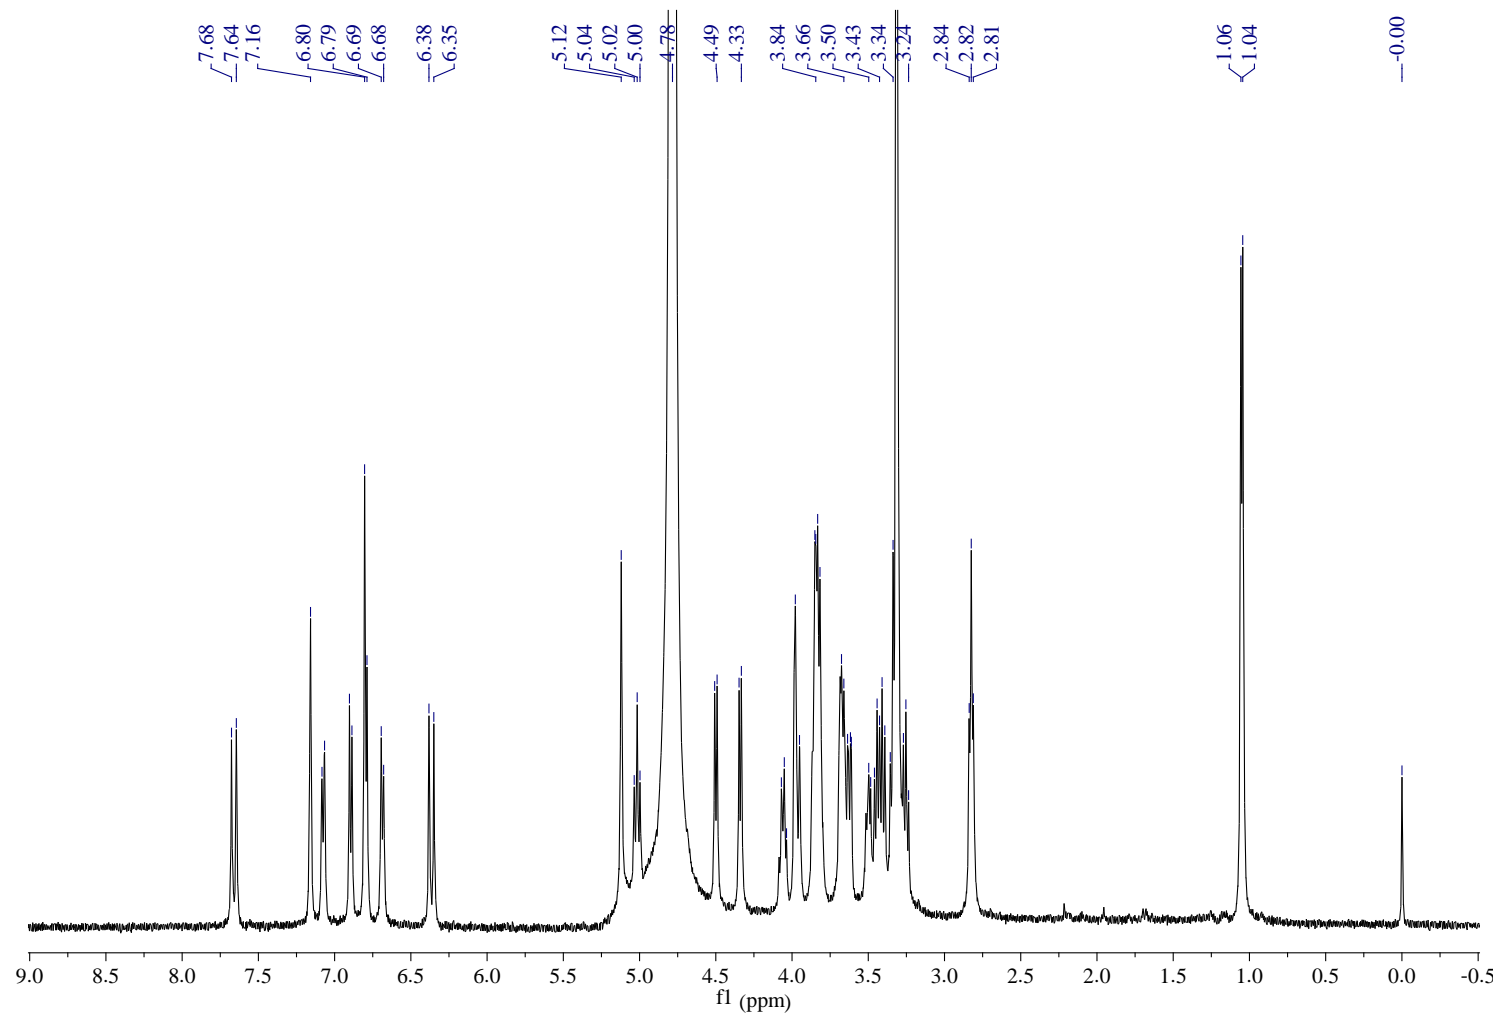

**Figure S1** <sup>1</sup>H NMR spectrum of echinacoside (CD<sub>3</sub>OD:D<sub>2</sub>O=1:1, 500 MHz).

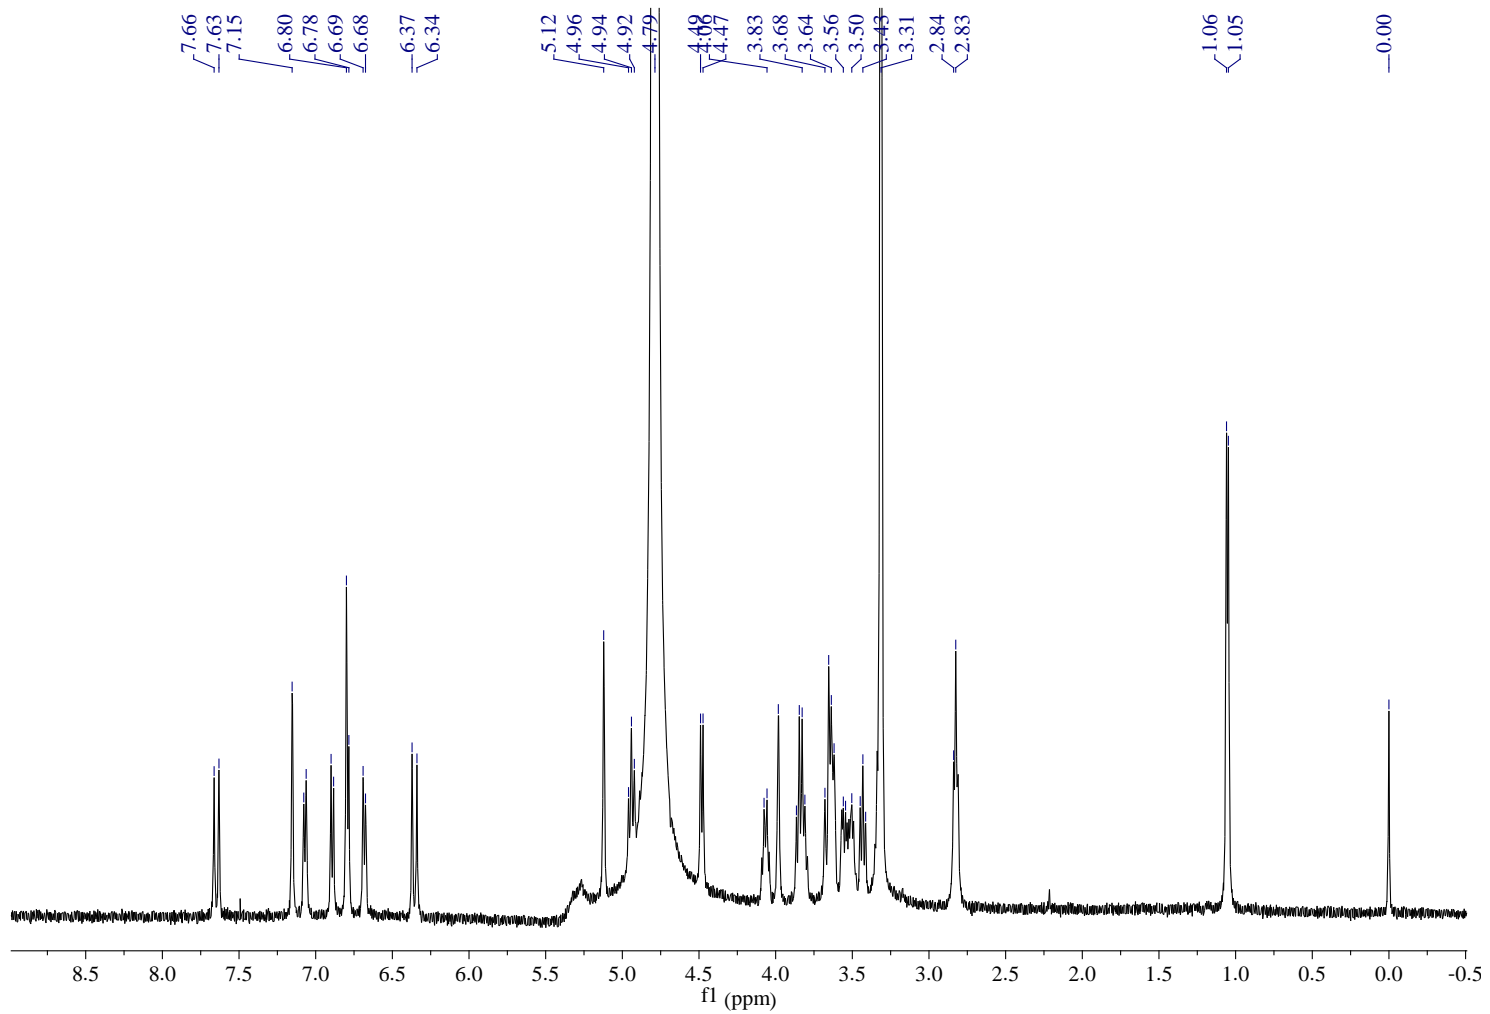

**Figure S2** <sup>1</sup>H NMR spectrum of verbascoside (also known as acteoside) (CD<sub>3</sub>OD:D<sub>2</sub>O=1:1, 500 MHz).

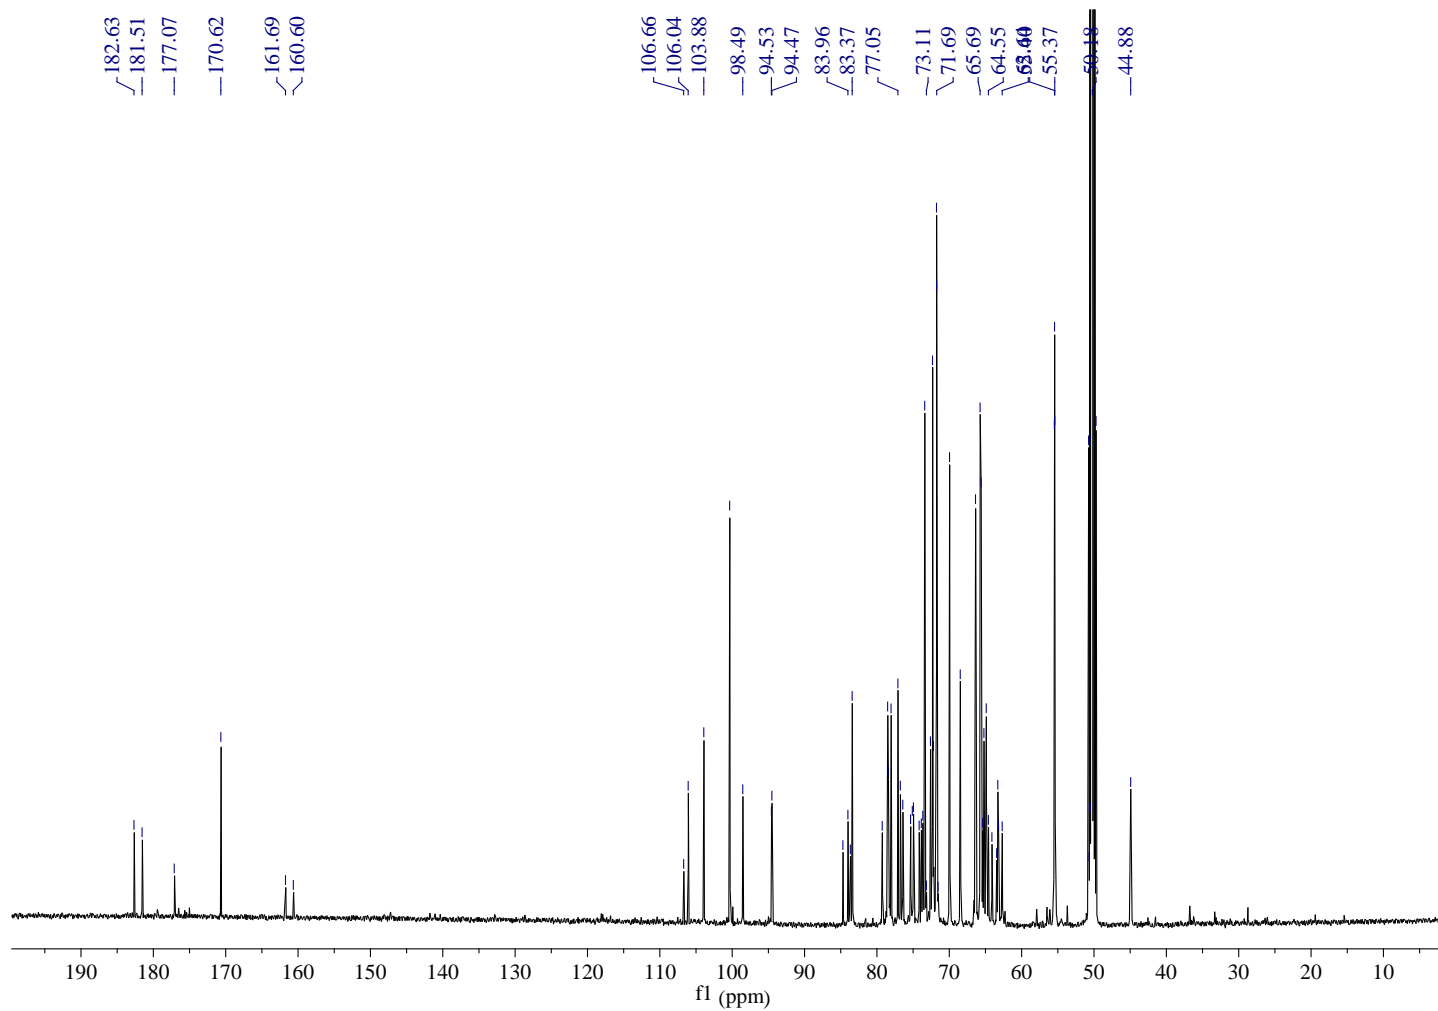

**Figure S3** Representative  $^{13}\text{C}$  NMR spectrum of *C. deserticola* ( $\text{CD}_3\text{OD}:\text{D}_2\text{O}=1:1$ , 500 MHz).

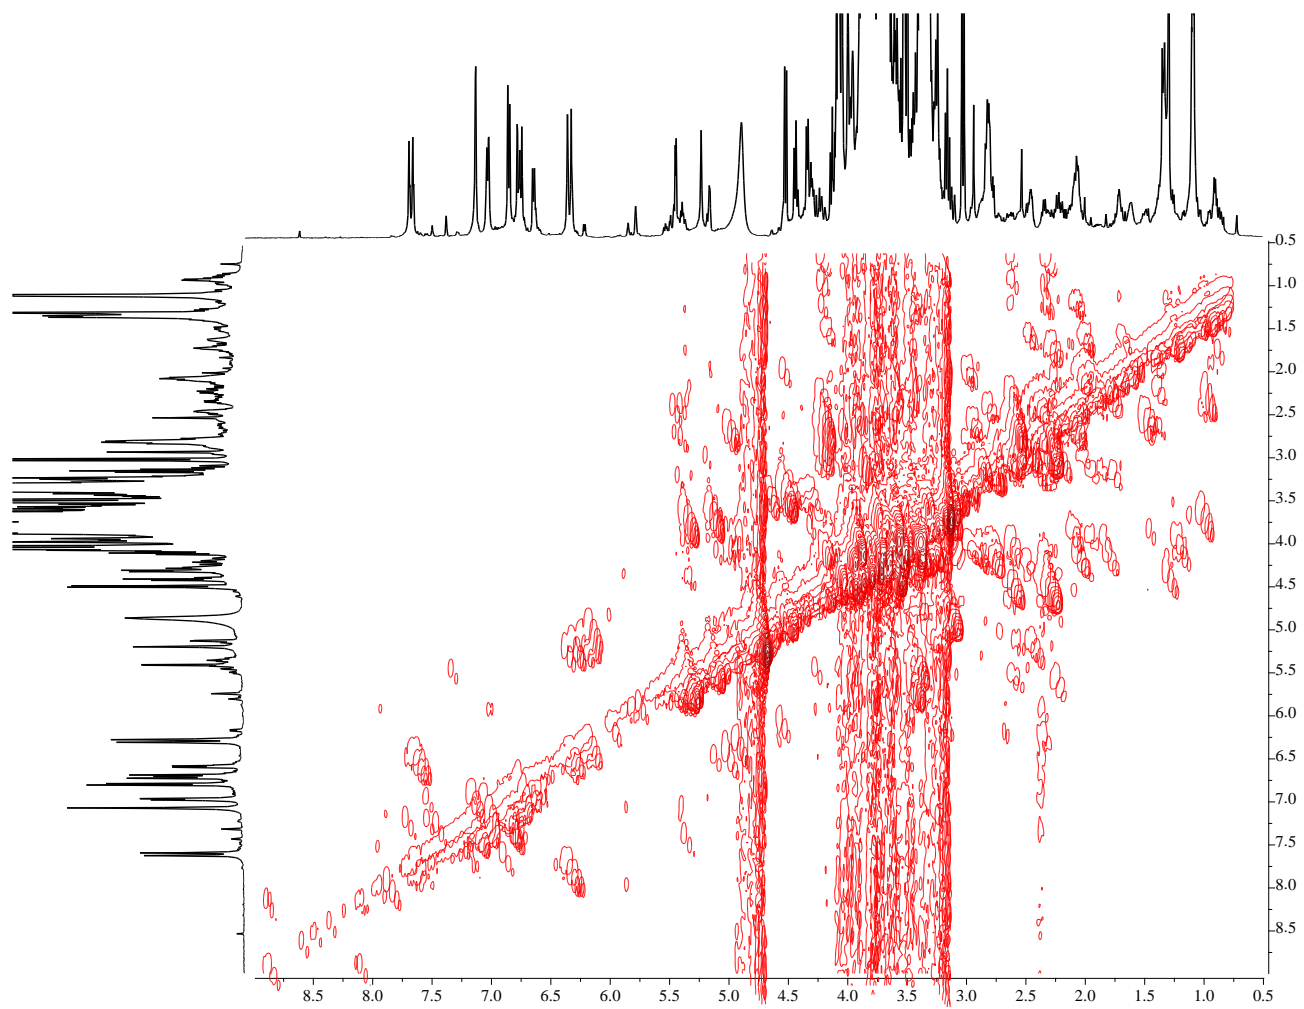

**Figure S4** Representative  $^1\text{H}$ - $^1\text{H}$  COSY spectrum of *C. deserticola* ( $\text{CD}_3\text{OD}:\text{D}_2\text{O}=1:1$ , 500 MHz).

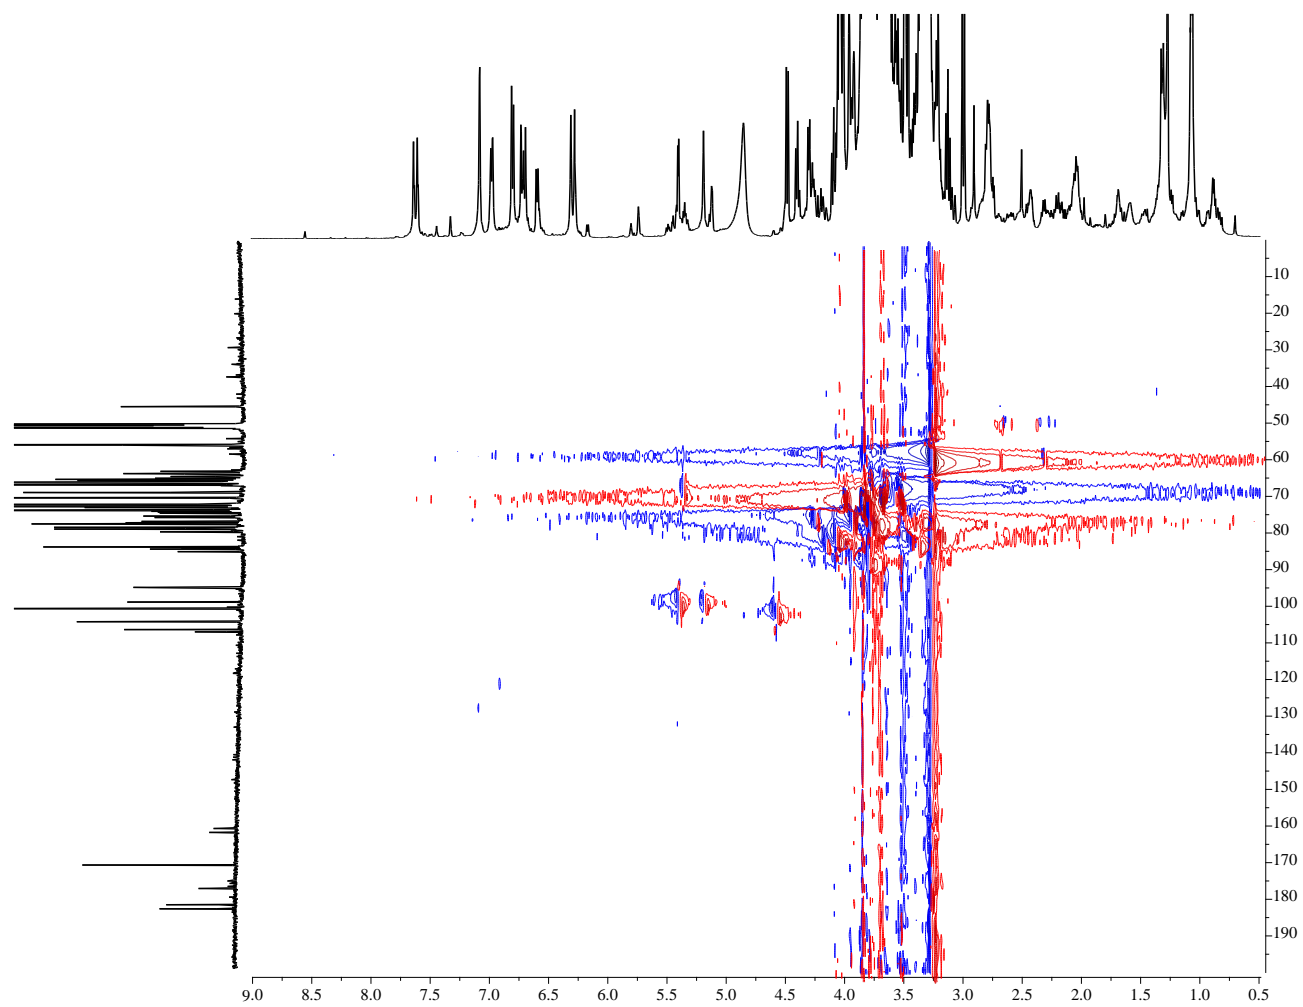

**Figure S5** Representative HSQC spectrum of *C. deserticola* ( $\text{CD}_3\text{OD}:\text{D}_2\text{O}=1:1$ , 500 MHz).



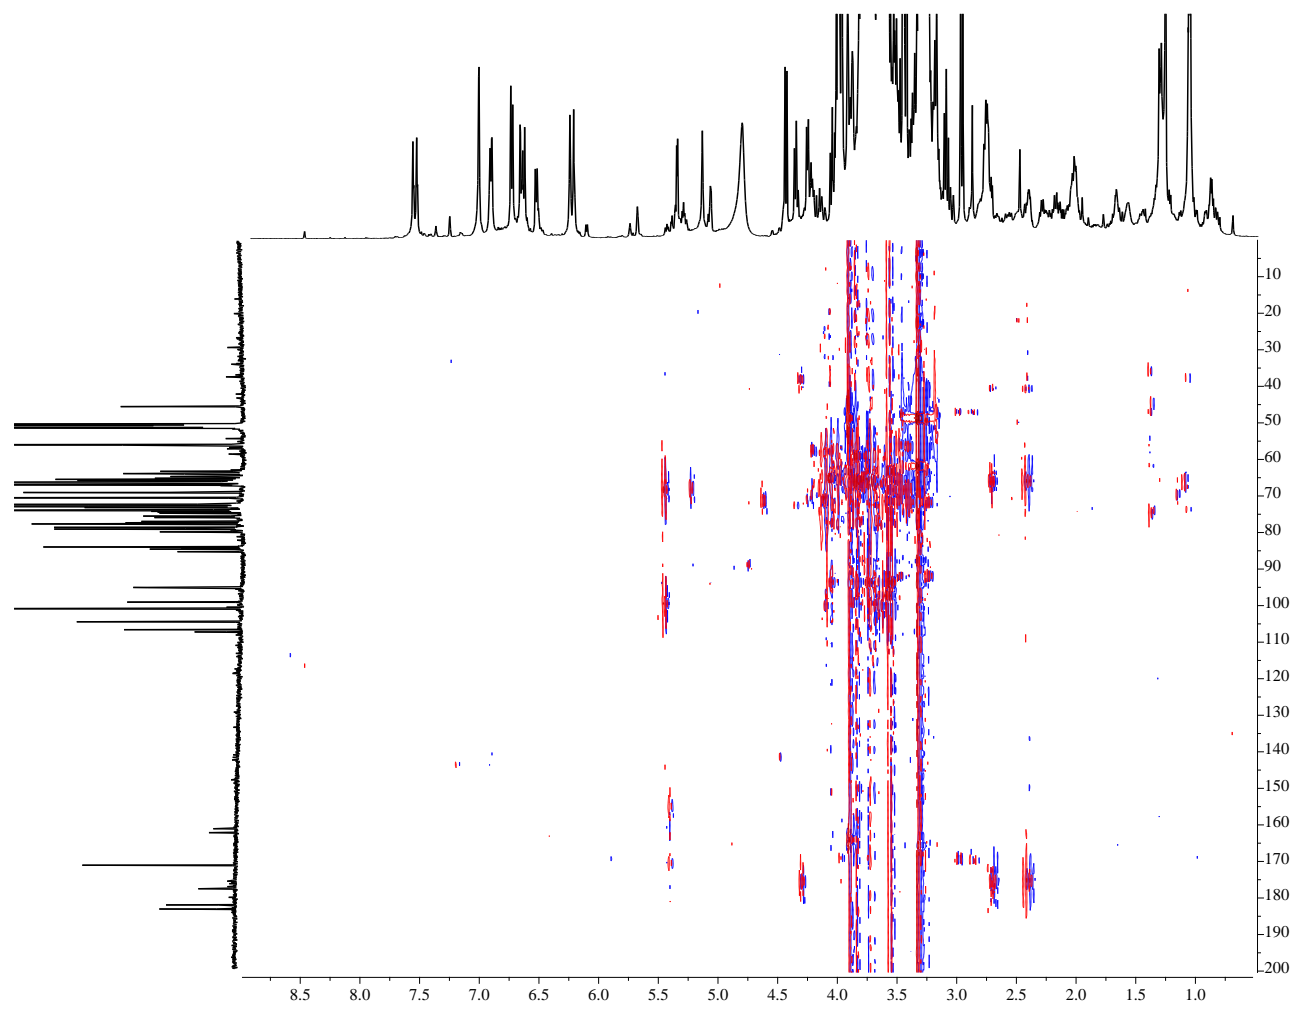

**Figure S6** Representative HMBc spectrum of *C. deserticola* (CD<sub>3</sub>OD:D<sub>2</sub>O=1:1, 500 MHz).

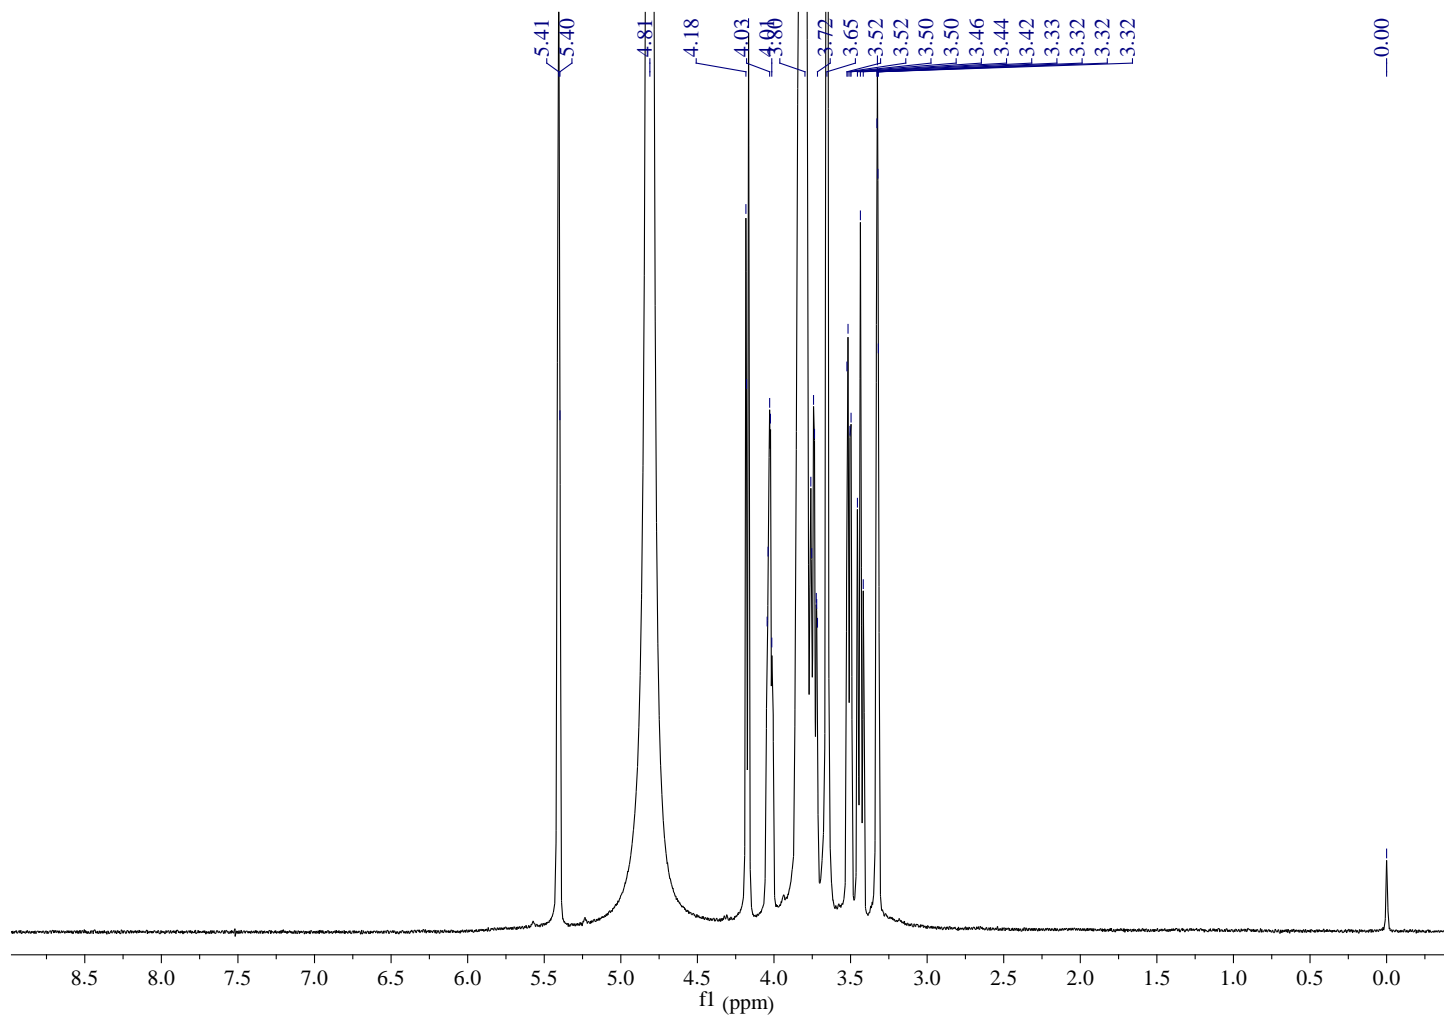

**Figure S7**  $^1\text{H}$  NMR spectrum of sucrose ( $\text{CD}_3\text{OD}:\text{D}_2\text{O}=1:1$ , 500 MHz).

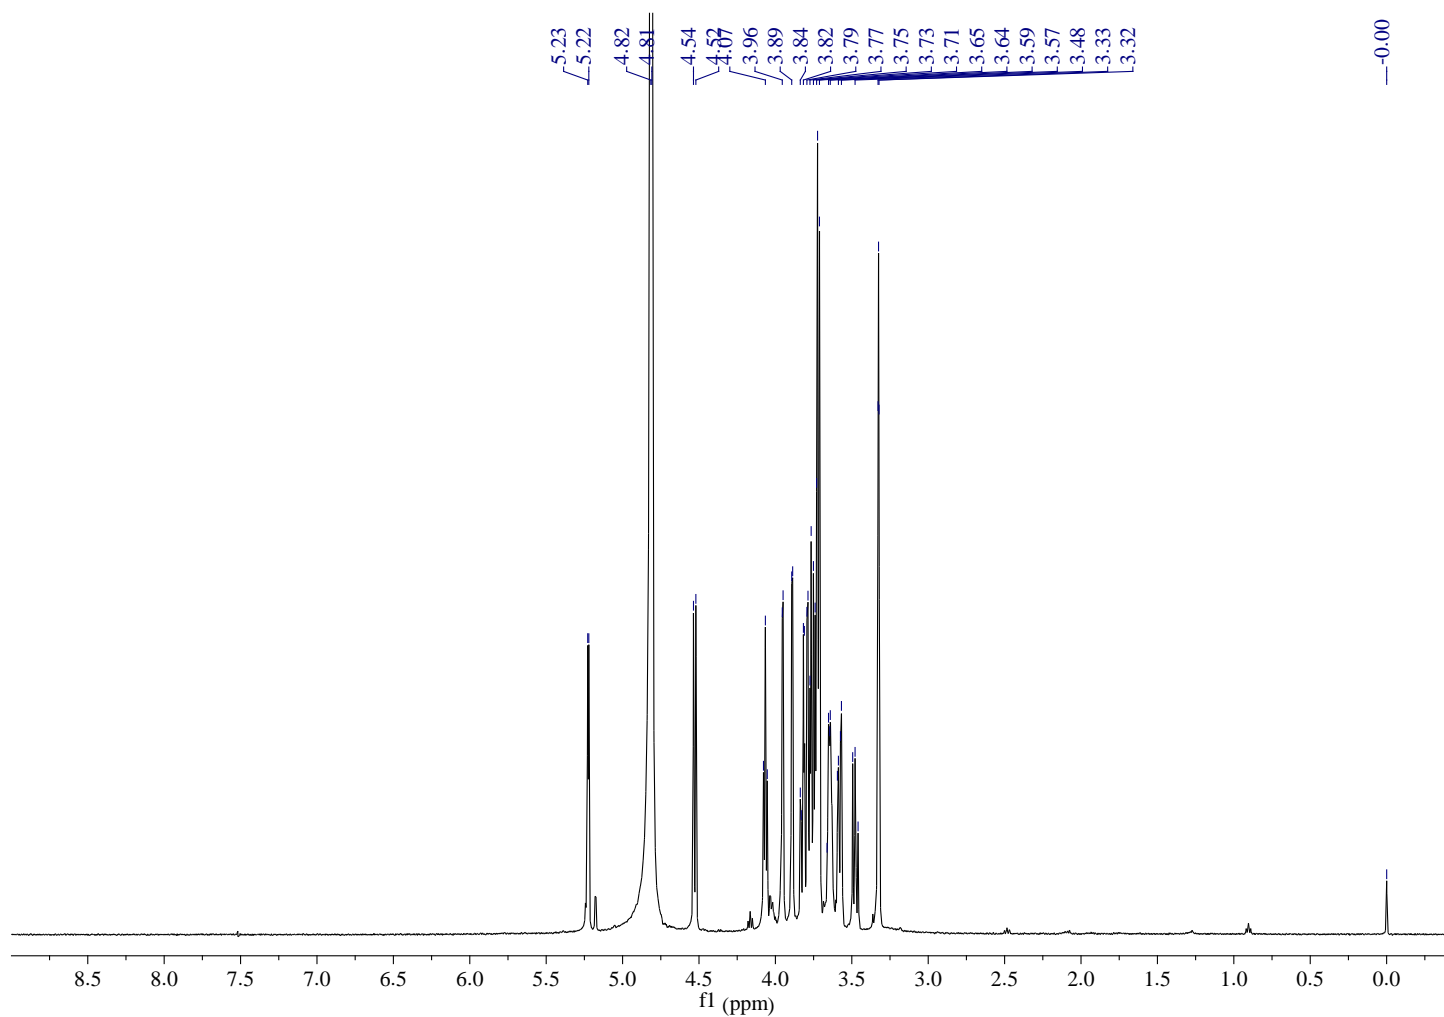

**Figure S8** <sup>1</sup>H NMR spectrum of β-galactose (CD<sub>3</sub>OD:D<sub>2</sub>O=1:1, 500 MHz).

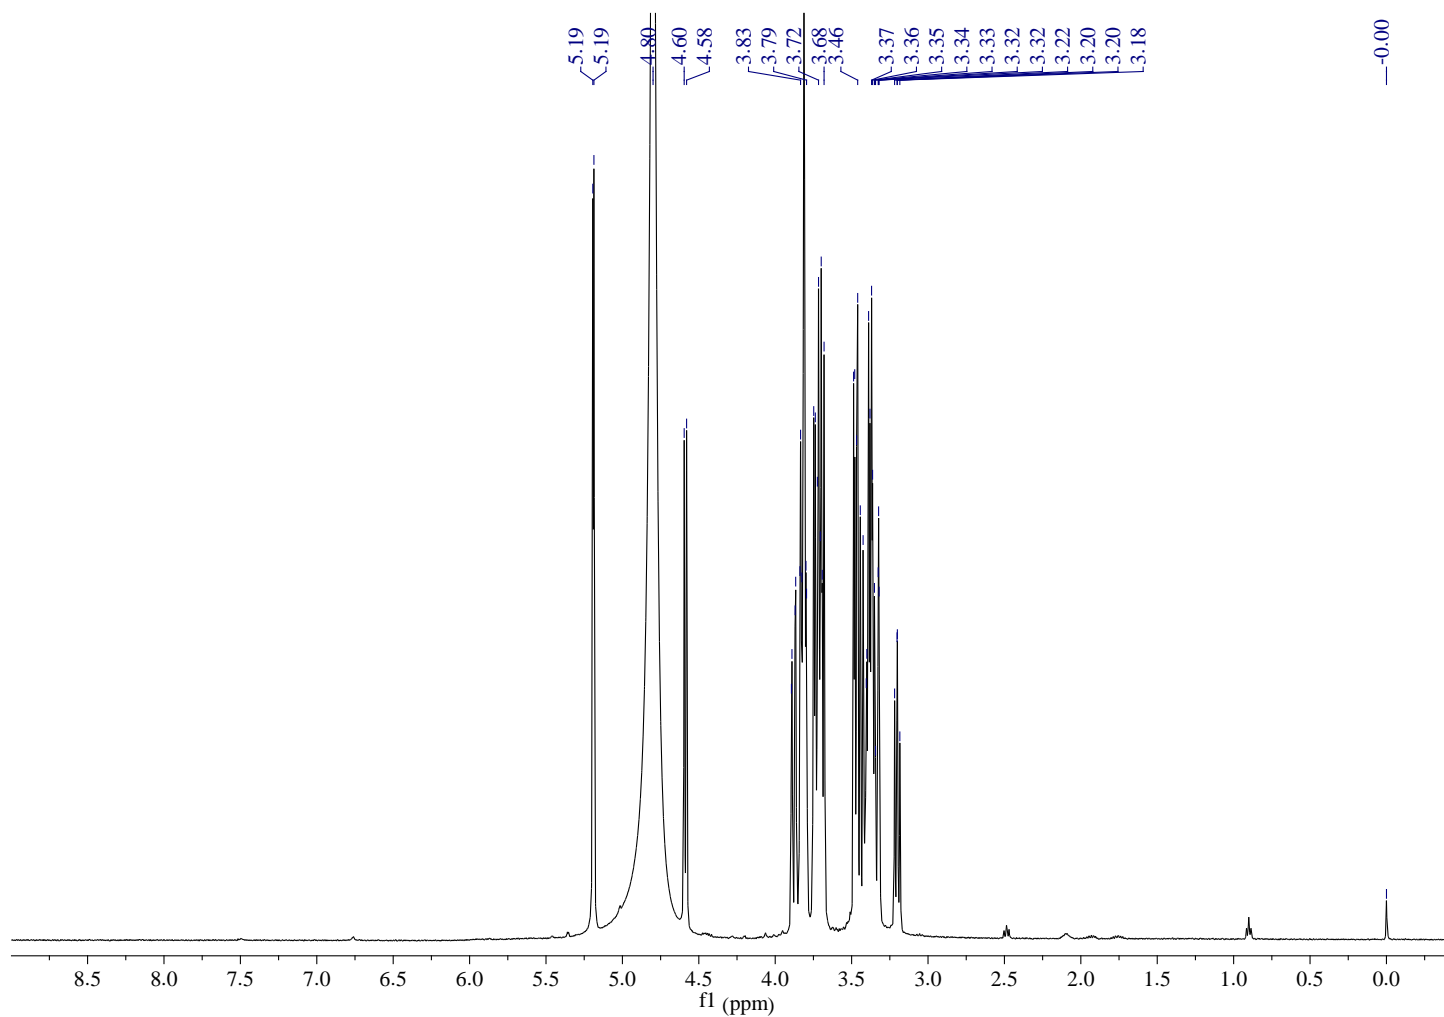

**Figure S9** <sup>1</sup>H NMR spectrum of β-glucose (CD<sub>3</sub>OD:D<sub>2</sub>O=1:1, 500 MHz).

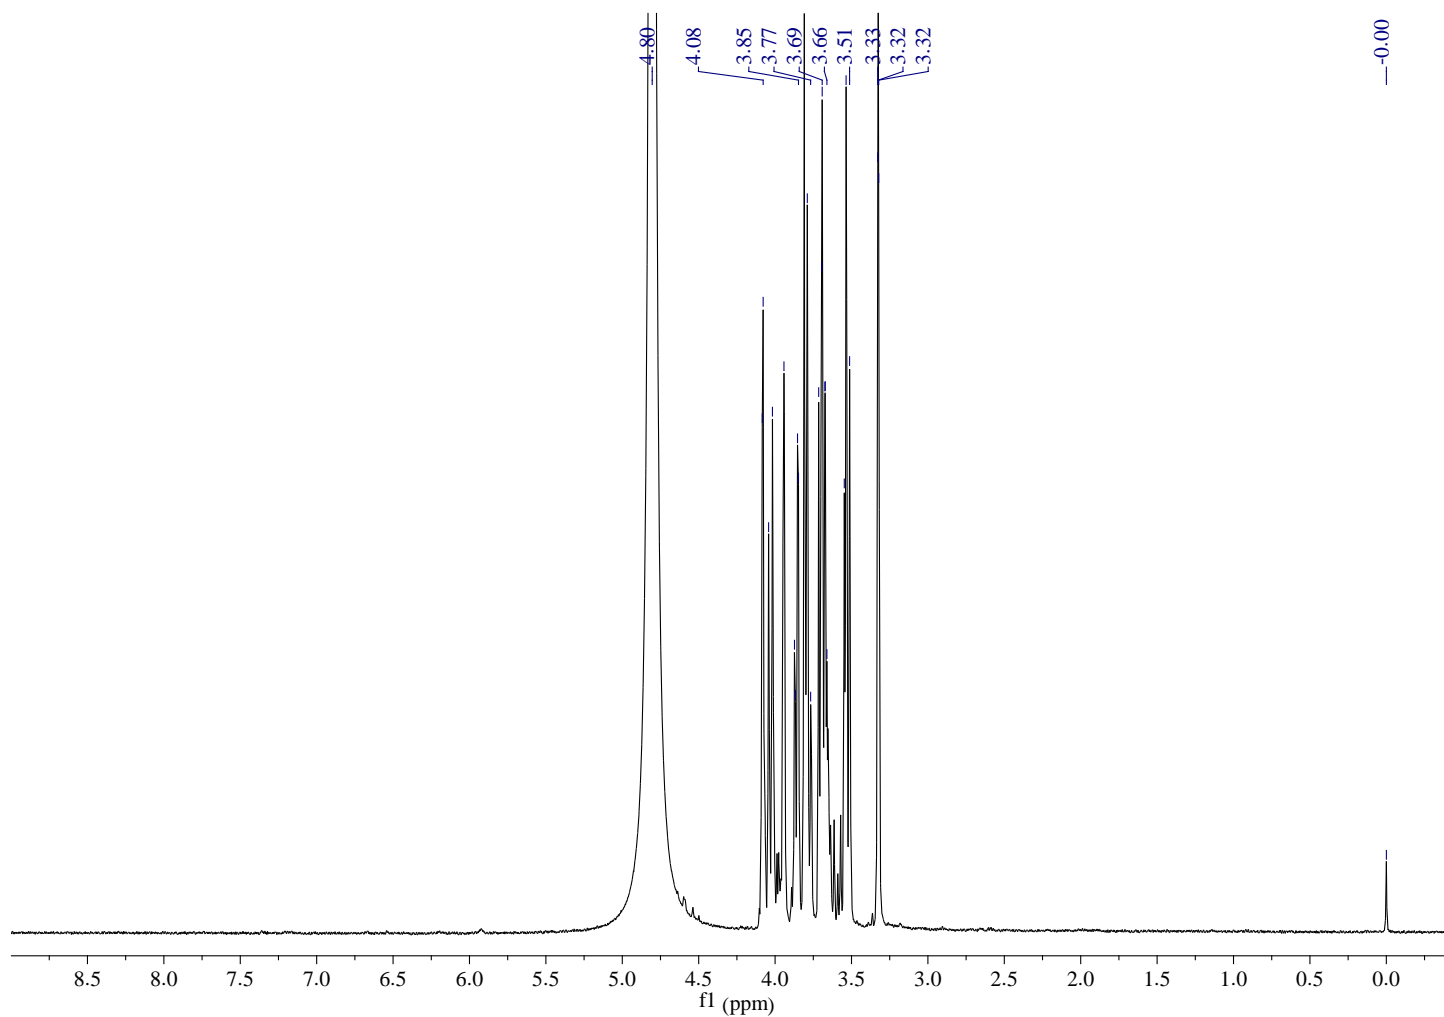

**Figure S10** <sup>1</sup>H NMR spectrum of mannitol (CD<sub>3</sub>OD:D<sub>2</sub>O=1:1, 500 MHz).
